# Supplementary material for: Use of Enzymatically Activated Carbon Monoxide Donors for Sensitizing Drug-Resistant Tumor Cells
Source: MDPI journal article supplement (doi:10.3390/ijms241411258), 2023-07-09

## Supporting Information

# Use of Enzymatically Activated Carbon Monoxide Donors for Sensitizing Drug-Resistant Tumor Cells

Federica Sodano <sup>1</sup>, Barbara Rolando <sup>2</sup>, Loretta Lazzarato <sup>2</sup>, Costanzo Costamagna <sup>3</sup>, Mariacristina Failla <sup>2</sup>, Chiara Righanti <sup>3</sup> and Konstantin Chegaev <sup>2,\*</sup>

<sup>1</sup> Department of Pharmacy, “Federico II” University of Naples, 80131 Naples, Italy;  
federica.sodano@unina.it

<sup>2</sup> Department of Drug Science and Technology, University of Torino, 10125 Torino, Italy;  
barbara.rolando@unito.it (B.R.); loretta.lazzarato@unito.it (L.L.);  
mariacristina.failla@unito.it (M.F.)

<sup>3</sup> Department of Oncology, University of Torino, 10125 Torino, Italy;  
costanzo.costamagna@unito.it (C.C.); chiara.righanti@unito.it (C.R.)

Corresponding author: konstantin.chegaev@unito.it; Tel.: +39-0116707140

## Table of contents

**Figure S1.** Degradation of compound 1 in human serum .....S2

**Figure S2.** Mitochondrial parameters and caspases activation in triple negative breast cancer cells treated with compound 1 and docetaxel.....S3

**Figure S3.** Mitochondrial and total ROS and lipoperoxidation in triple negative cancer cell lines treated with compound 1 and docetaxel .....S4

**NMR** characterization of compounds **1, 4 – 12** .....S5-S11

**MS** spectra of compounds **1, 4 – 12** .....S12-S15

**A**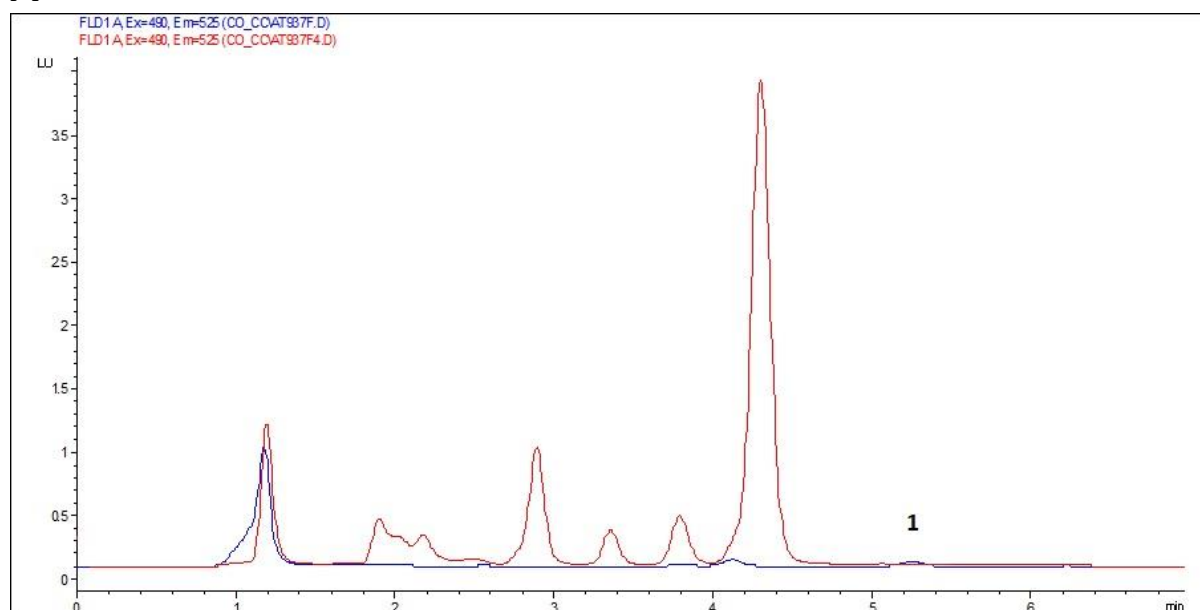**B**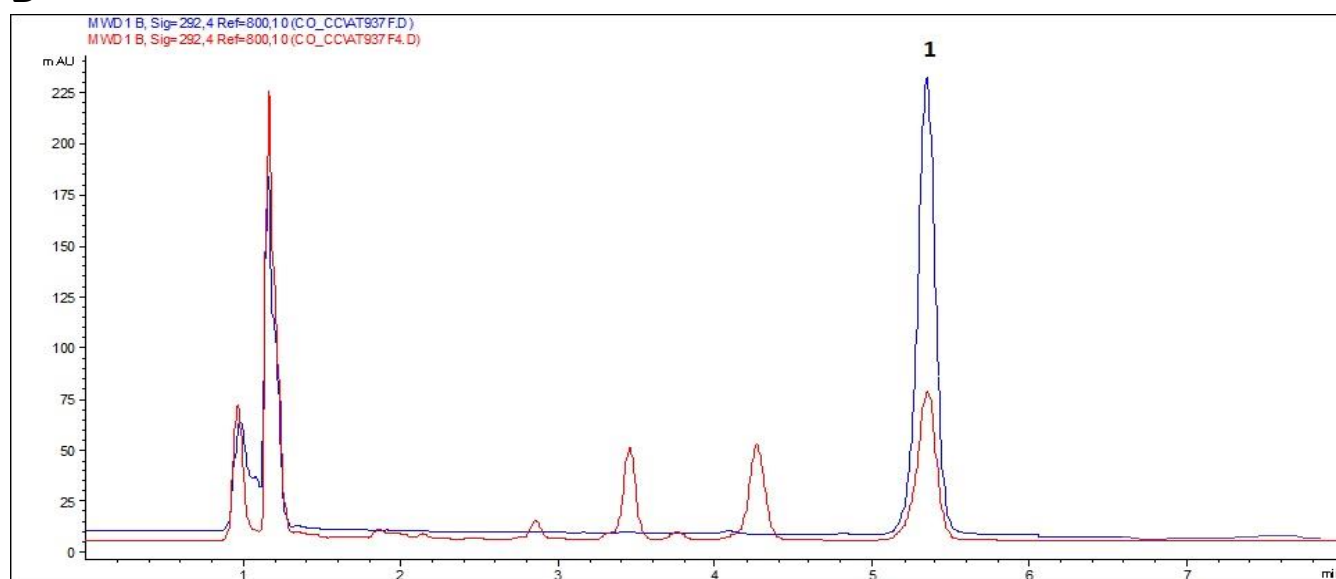

**Figure S1.** Degradation of compound **1** in human serum: chromatogram of **1** at time 0 (blue track) and after 180 min (red track) of incubation at 37°C in human serum; (A) Fluorescence detection (exc. 490, emiss. 525 nm); (B) UV detection at 292 nm (ref 800 nm).

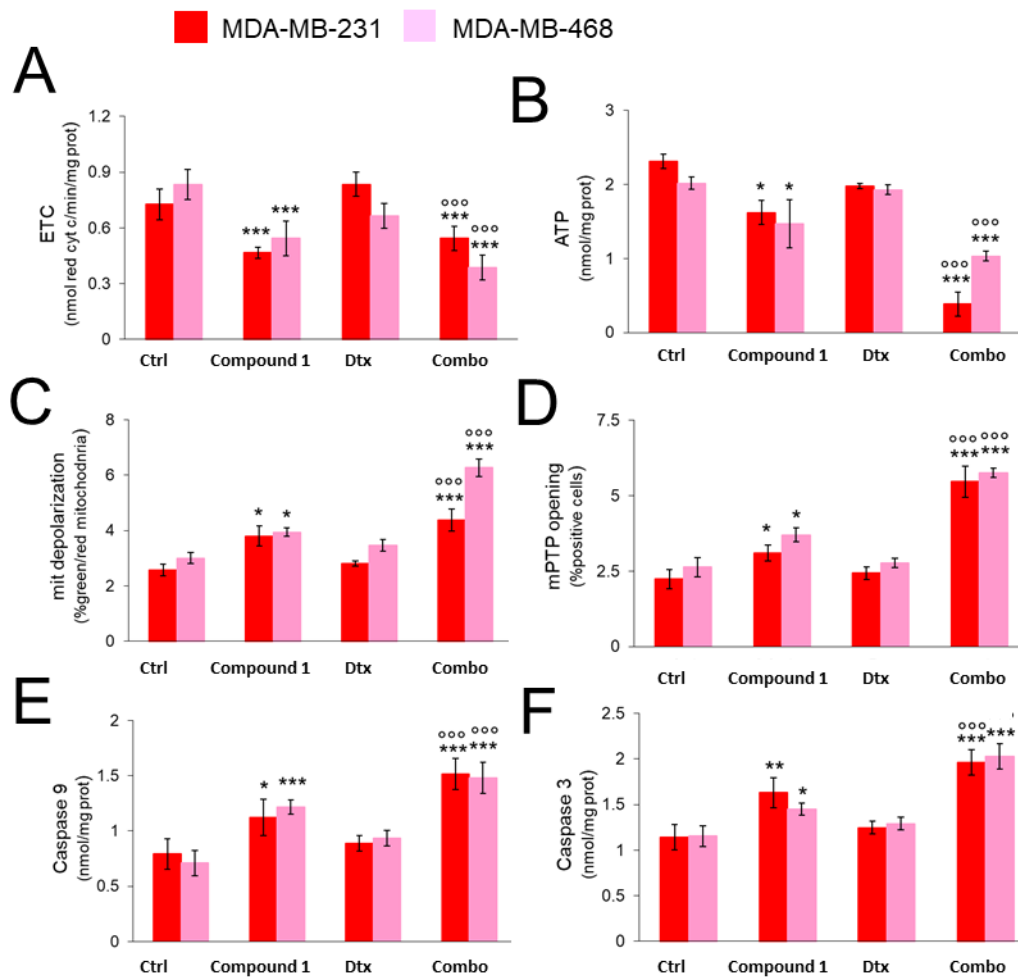

**Figure S2.** Mitochondrial parameters and caspases activation in triple negative breast cancer cells treated with compound 1 and docetaxel. Human triple negative breast cancer MDA-MB-231 and MDA-MB-468 cells were treated 24 h with 1  $\mu$ M compound 1+1  $\mu$ M docetaxel (Dtx), alone or in association (Combo). Ctrl: cells grown in fresh medium. (A) Electron transport chain measured spectrophotometrically. (B) Mitochondria ATP measured by chemiluminescence-based assay. (C-D) Percentage of mitochondria with depolarized membrane, as index of mitochondrial damage, assessed fluorometrically (C), and characterized by open mitochondrial permeability transition pore (mPTP), measured by flow cytometry (D). (E-F) Activity of caspase-9 (E) and caspase-3 (F), measured fluorometrically. All assays were performed in triplicate (n=3 biological replicates). Data are means  $\pm$  SD. \* $p$ <0.05, \*\* $p$ <0.01, \*\*\* $p$ <0.001: compound 1+chemotherapeutic drug versus untreated cells; °°° $p$ <0.001: compound 1+chemotherapeutic drug versus chemotherapeutic drug alone.

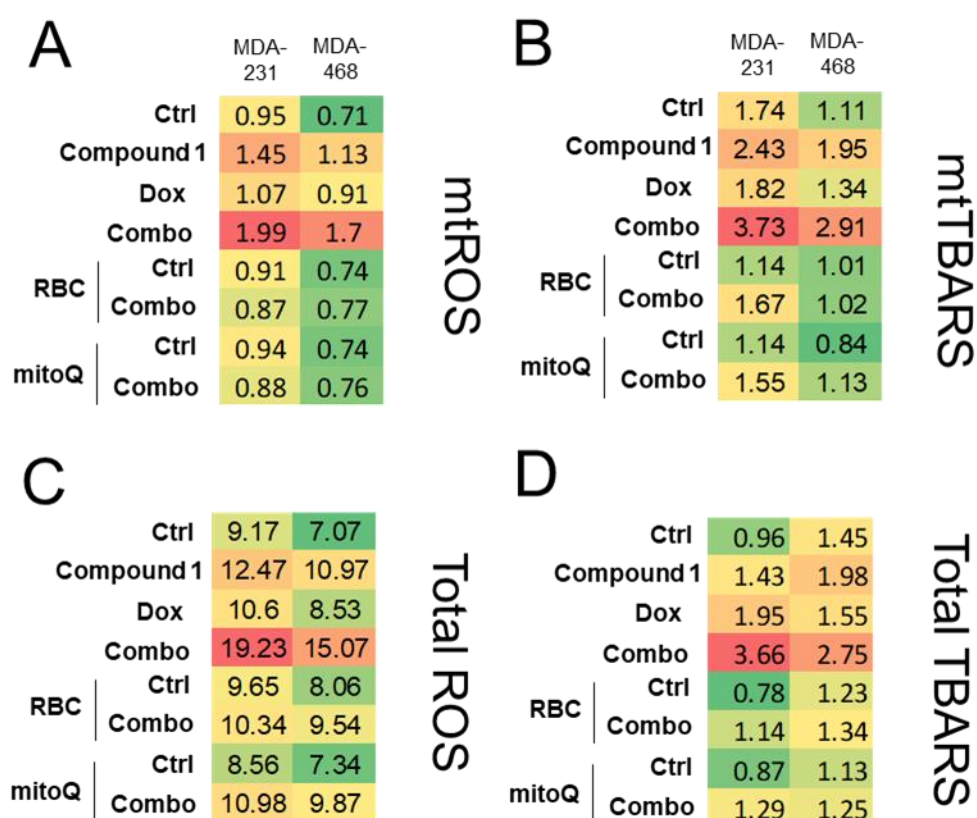

**Figure S3.** Mitochondrial and total ROS and lipoperoxidation in triple negative cancer cell lines treated with compound 1 and docetaxel. Human triple negative breast cancer MDA-MB-231 and MDA-MB-468 cells were treated 24 h with 1  $\mu$ M compound 1+1  $\mu$ M docetaxel (Dtx), alone or in association (Combo). Ctrl: cells grown in fresh medium. When indicated, 10  $\mu$ g/mL packed red blood cells (RBC), as a CO scavenger, or 0.4  $\mu$ M mitoquinol (mitoQ), as a mitochondrial ROS scavenger, were co-incubated. **(A-B)** ROS, as an index of oxidative stress, measured fluorometrically and TBARS, as an index of lipoperoxidation, determined spectrophotometrically in extracted mitochondria. **(C-D)** ROS and TBARS measured in whole cell lysate. All assays were performed in triplicate (n=3 biological replicates). Data are represented as heatmap (numbers correspond to means). For all panels: \*\* $p$ <0.01: compound 1 versus untreated cells, \*\*\* $p$ <0.001: compound 1+chemotherapeutic drug versus untreated cells; °°° $p$ <0.001: compound 1+chemotherapeutic drug versus chemotherapeutic drug alone; §§§ $p$ <0.001: compound 1+chemotherapeutic drug versus compound 1 alone; #### $p$ <0.001: RBC+Combo/mitoQ+Combo versus Combo alone.

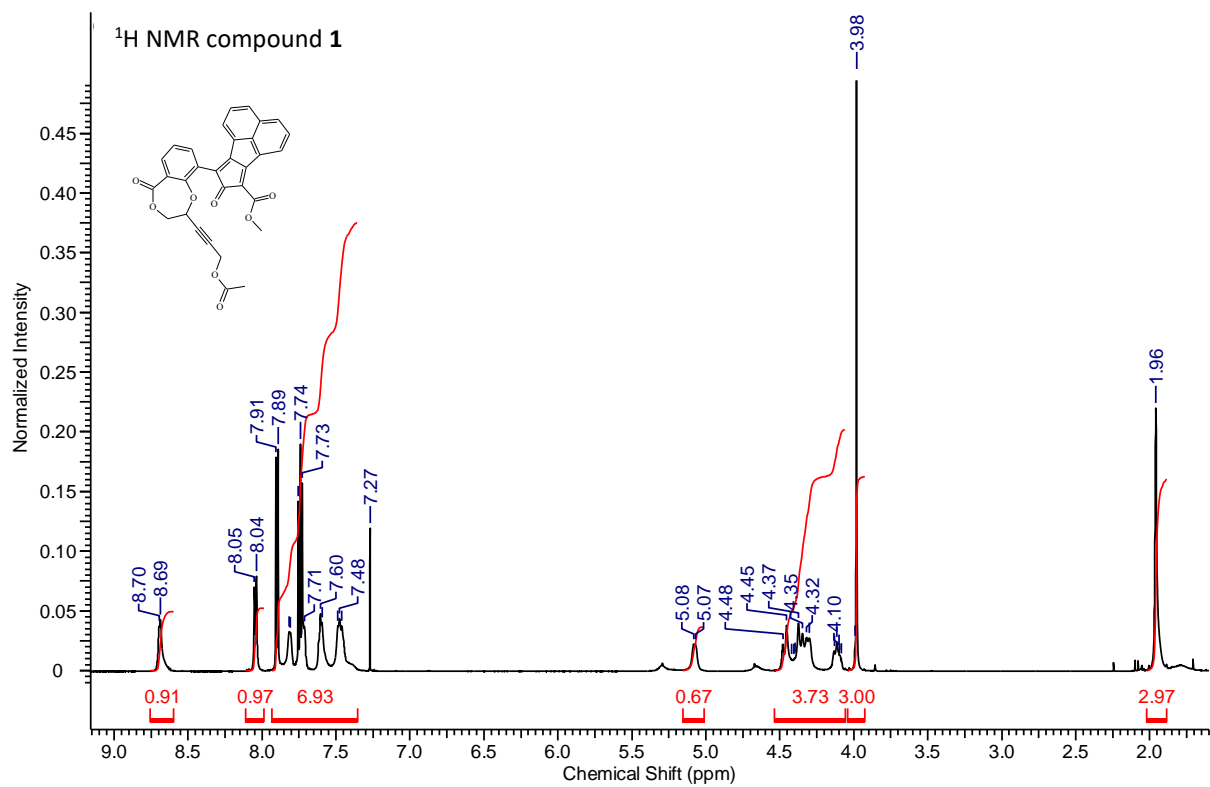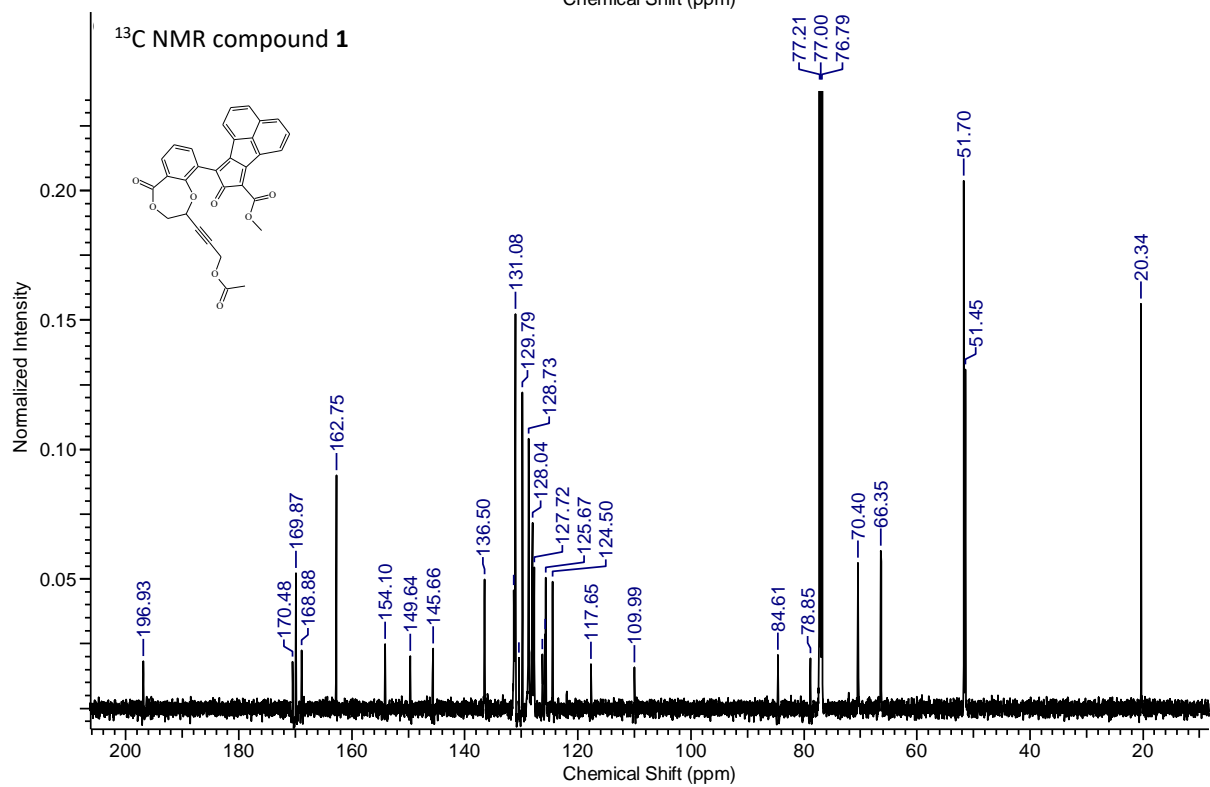

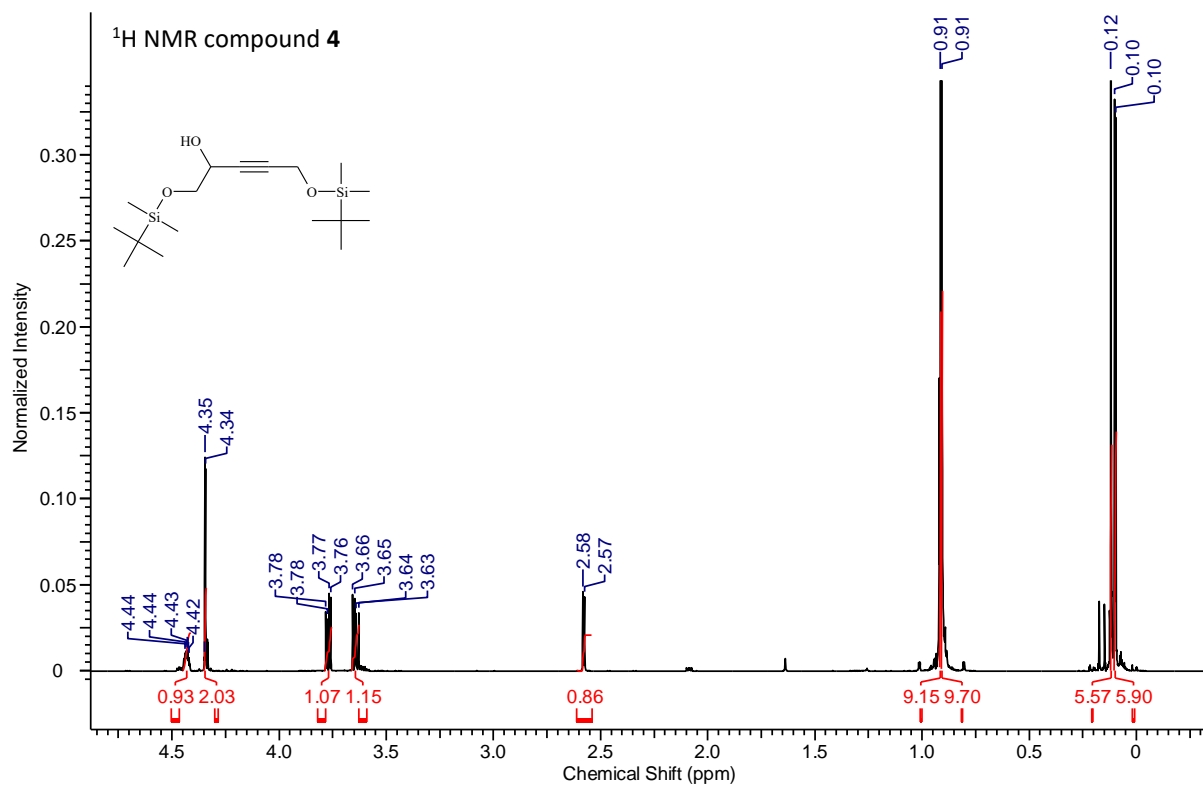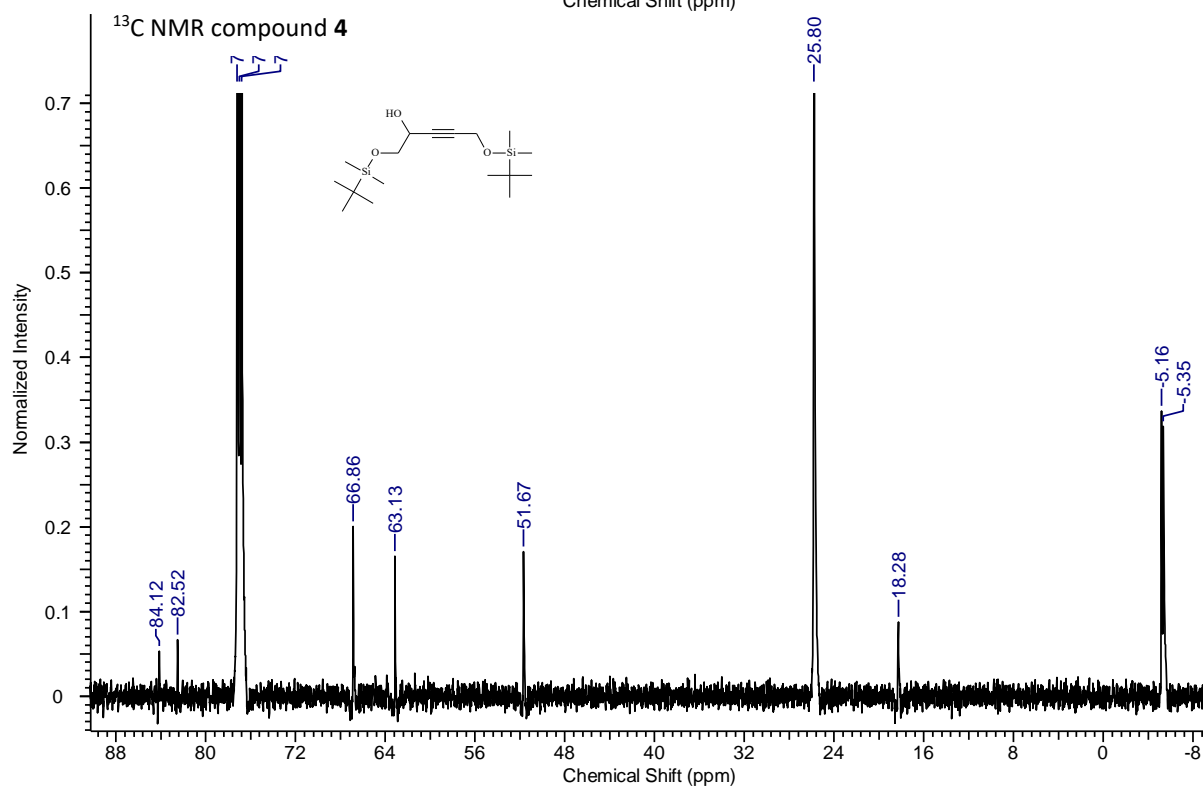

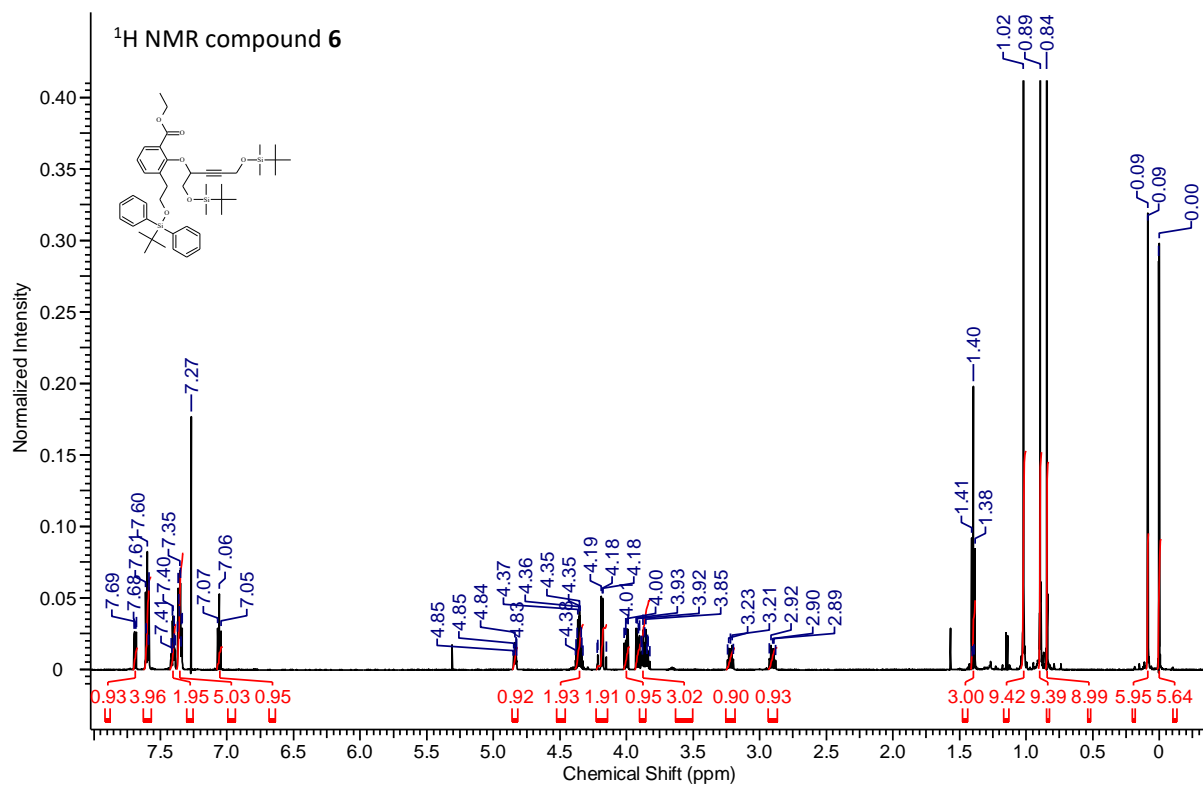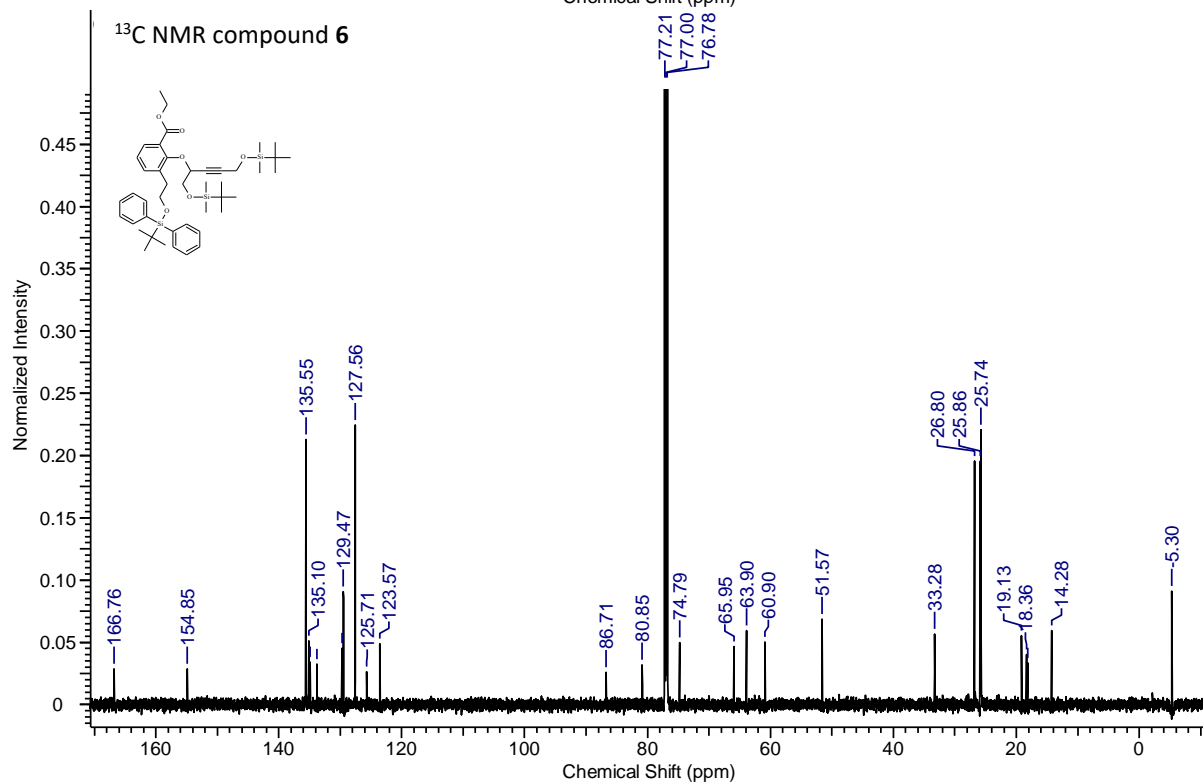

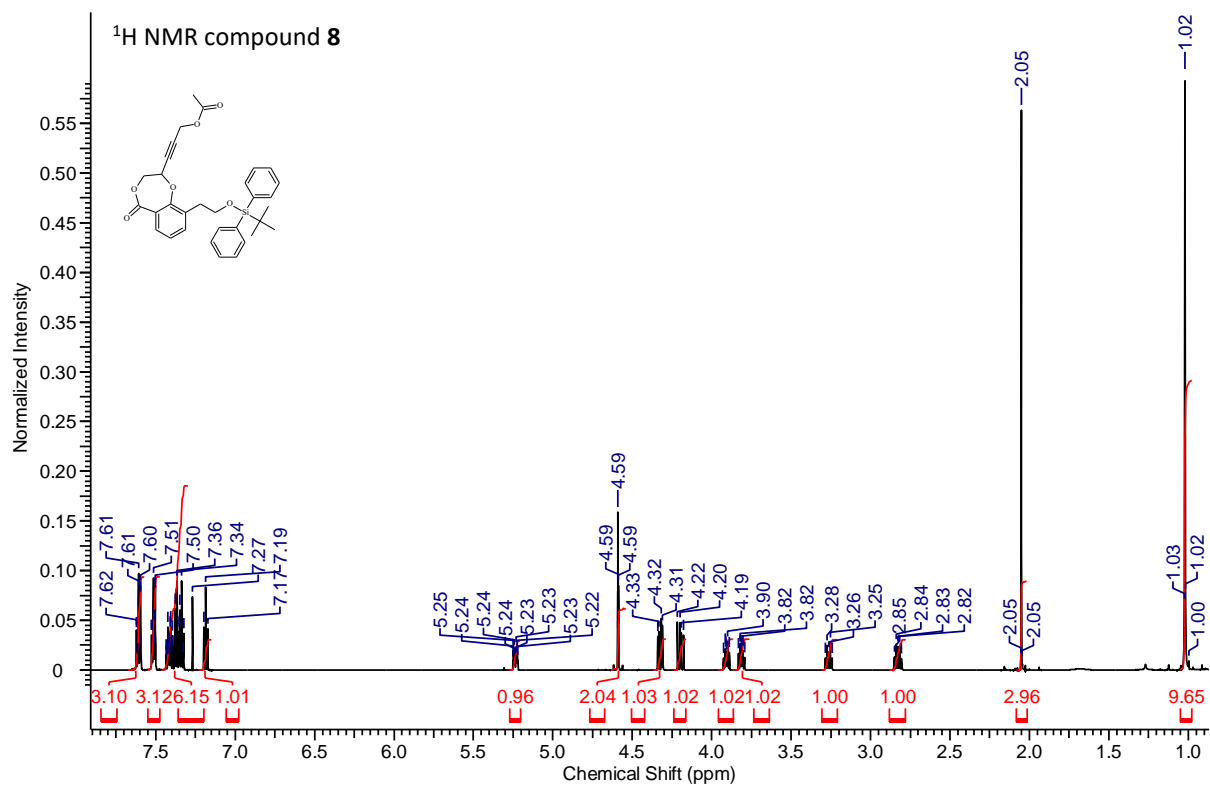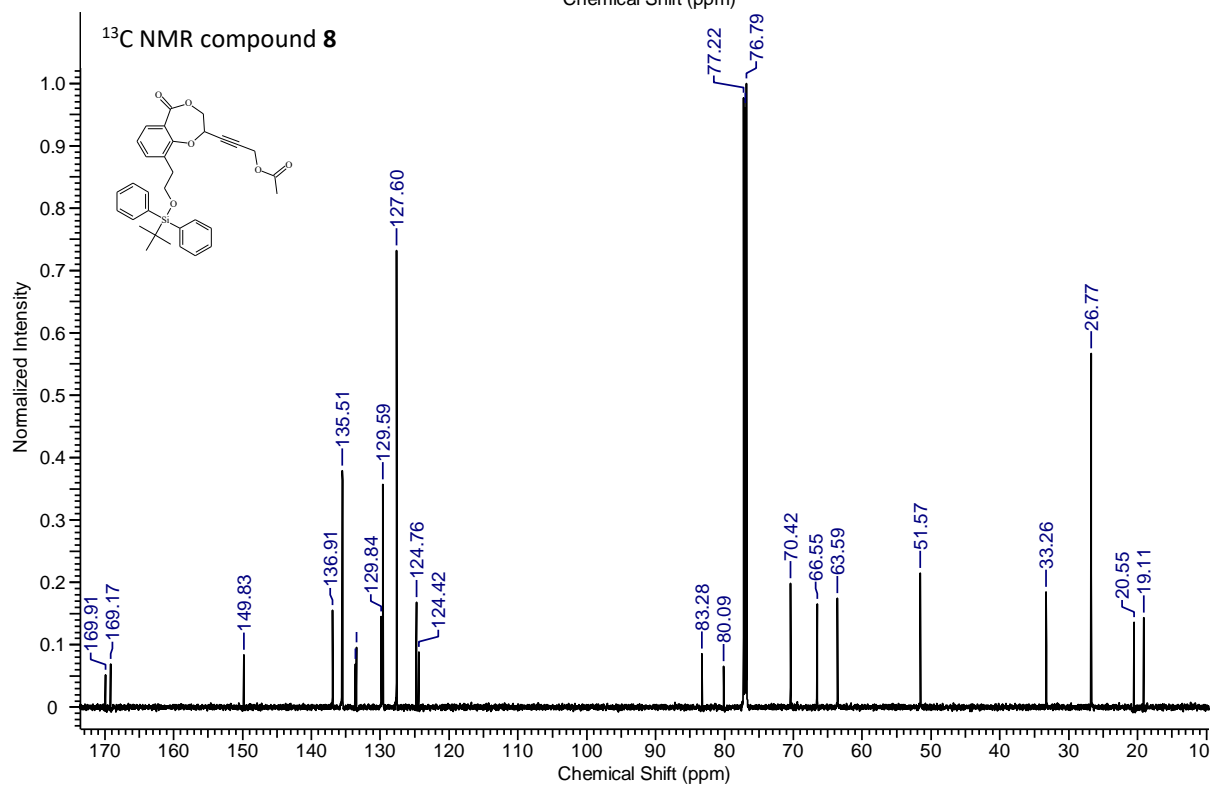

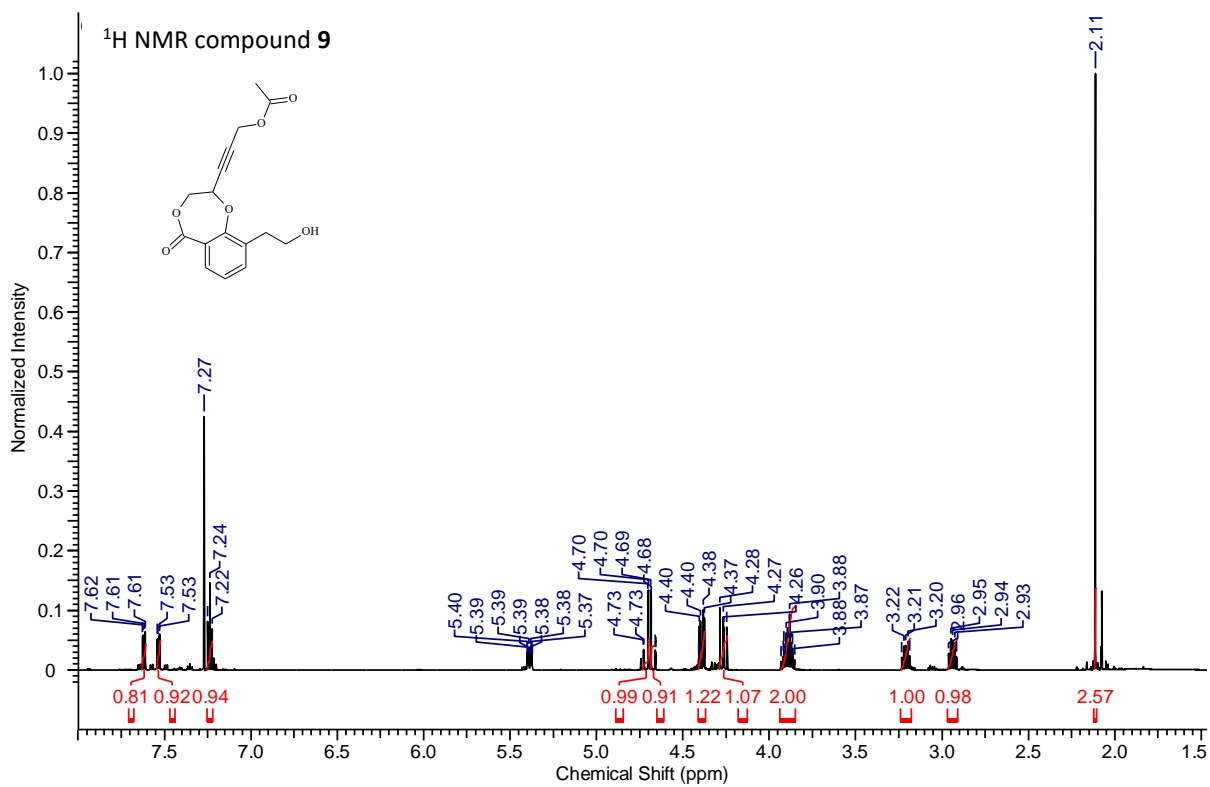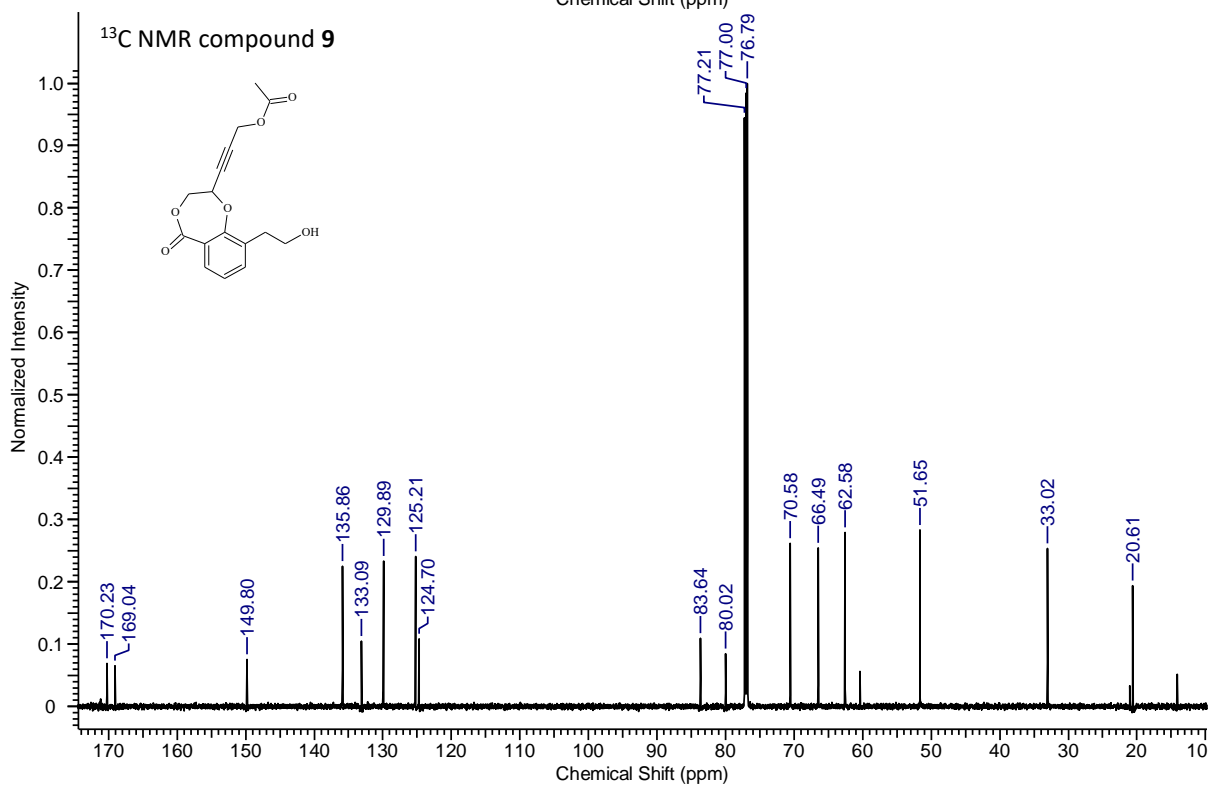

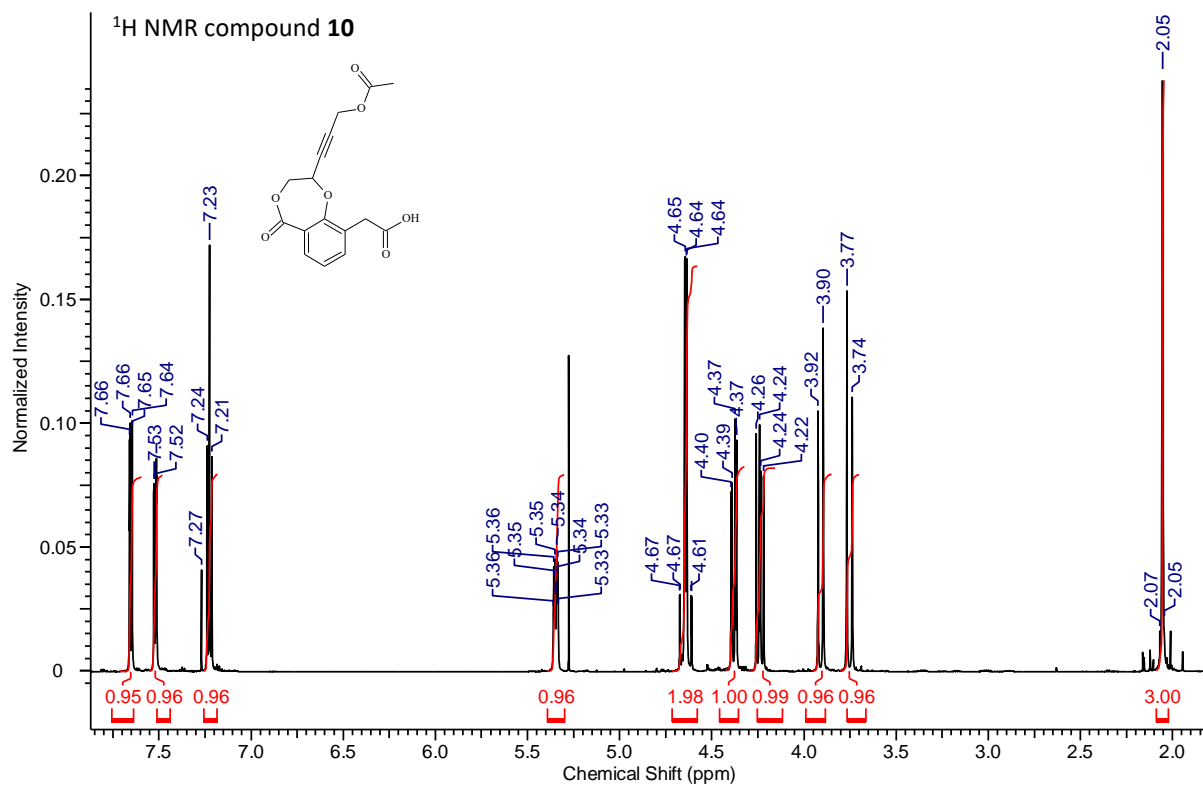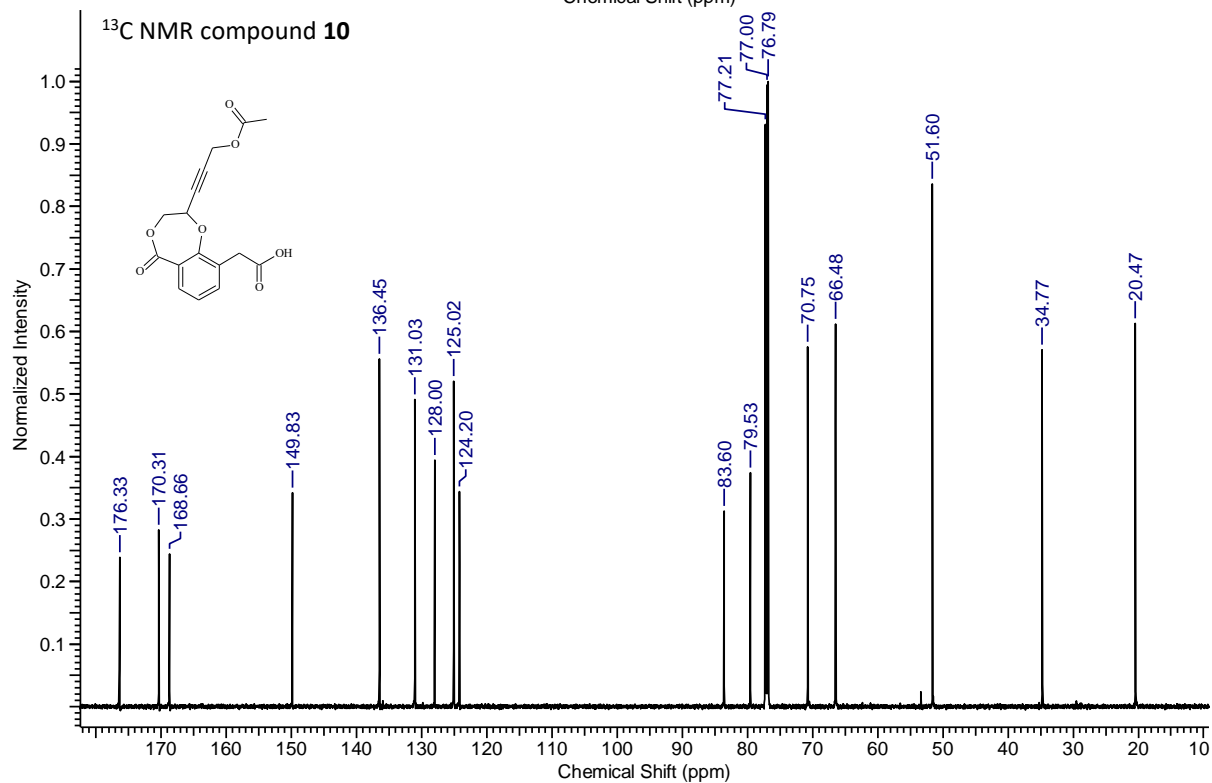

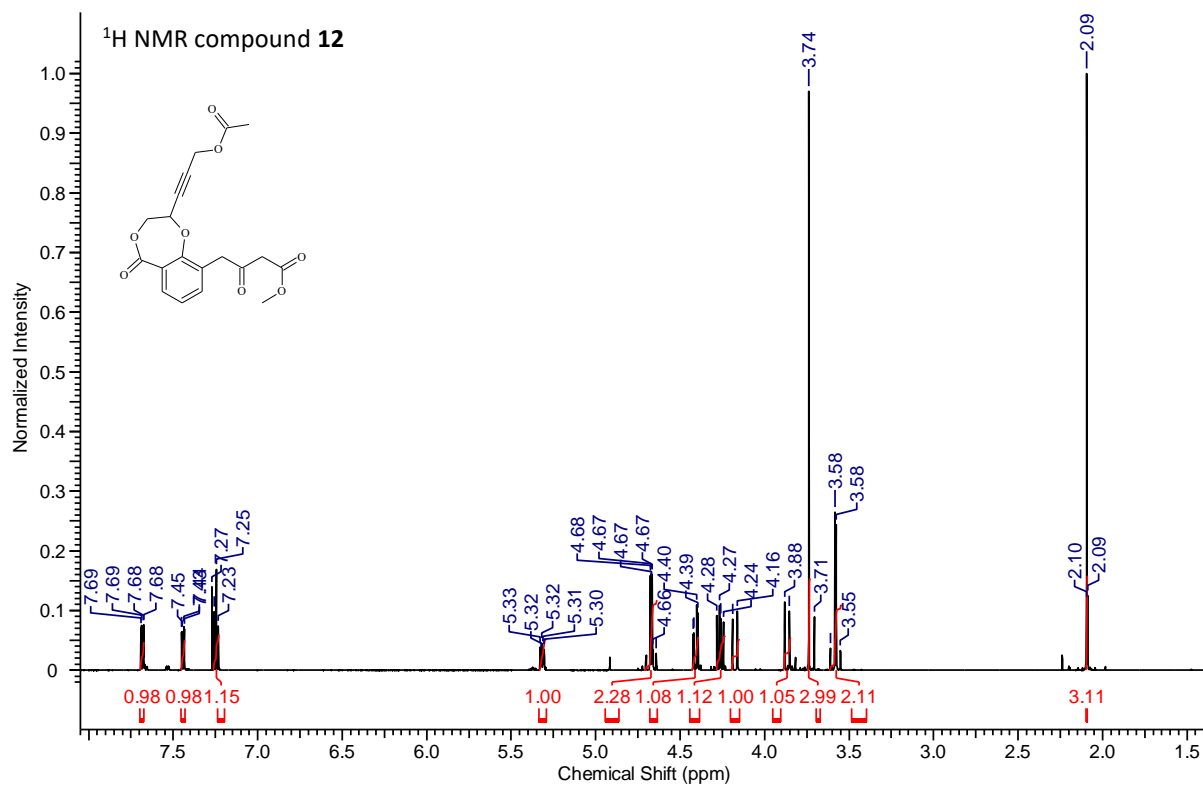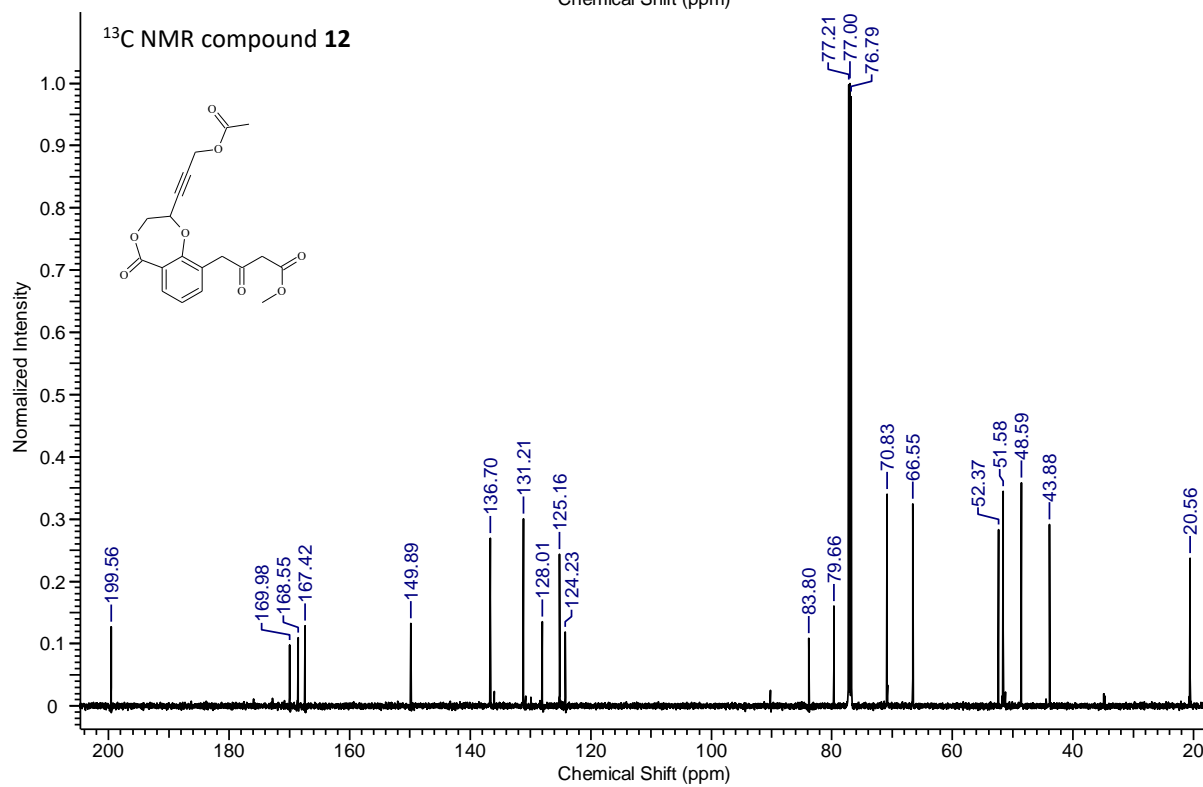

MS ESI<sup>+</sup> compound **1**

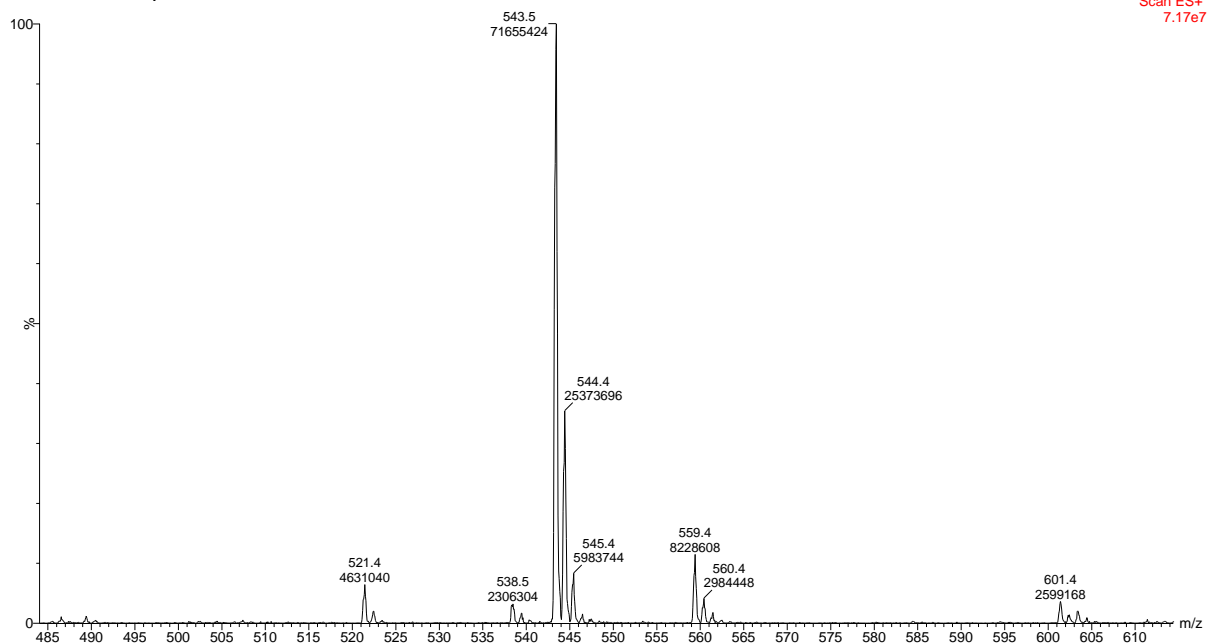

MS ESI<sup>+</sup> compound **4**

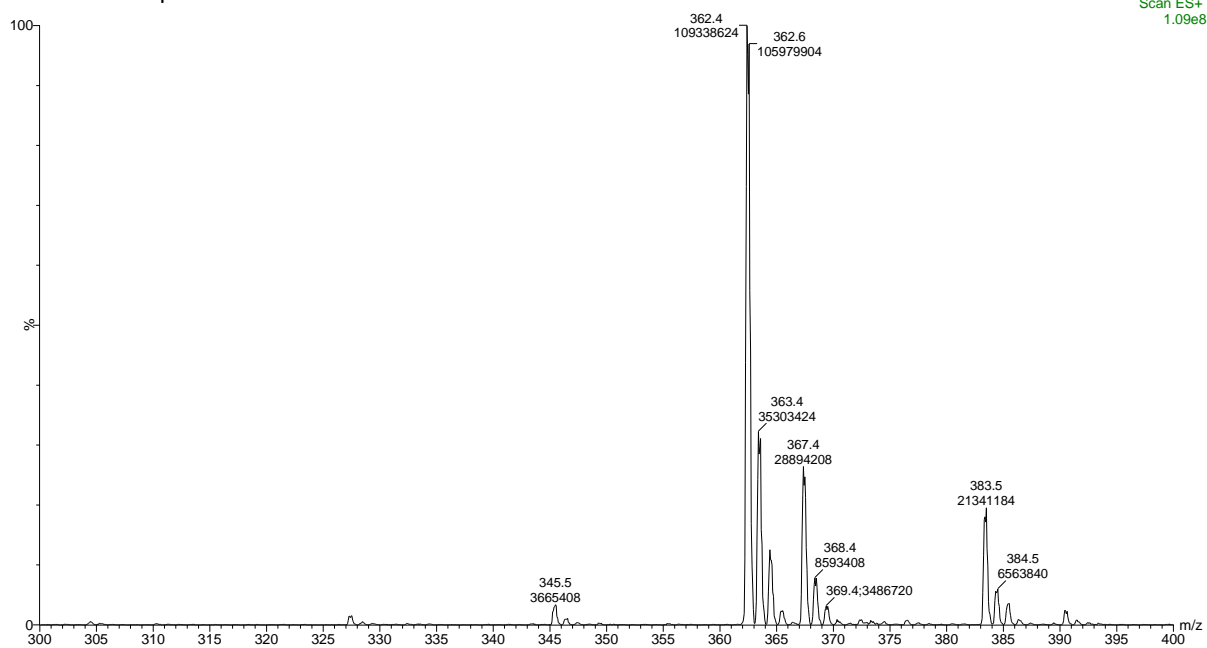

MS ESI<sup>+</sup> compound **6**

Scan ES+  
2.51e7

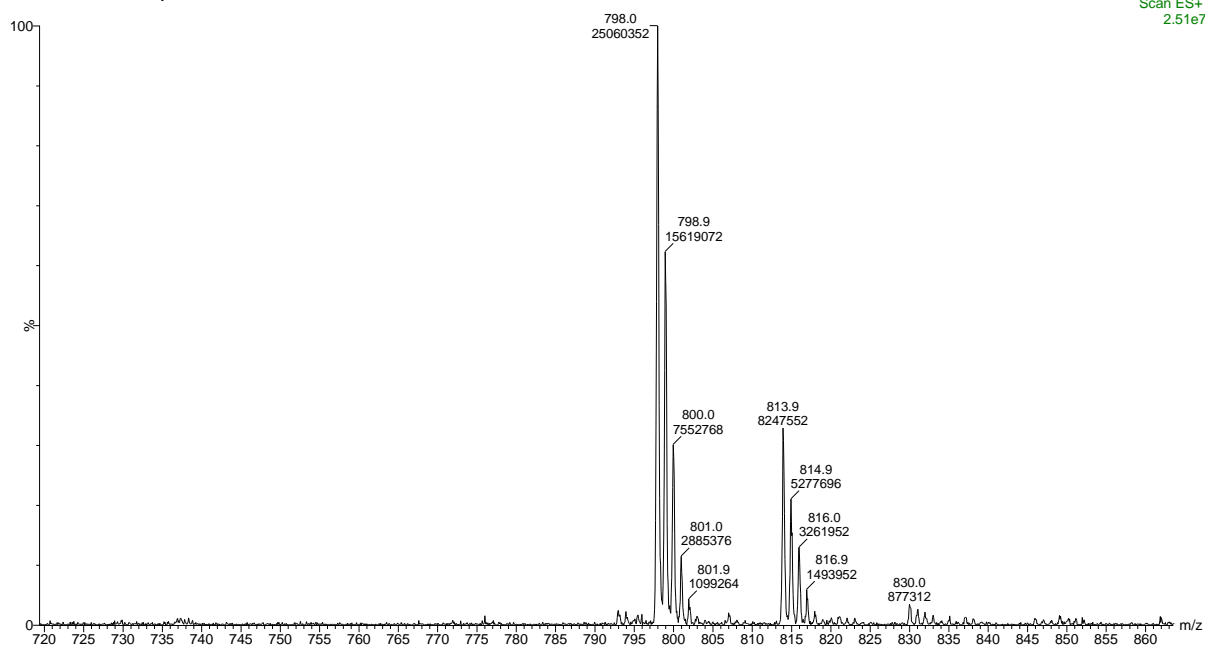

MS ESI<sup>+</sup> compound **8**

Scan ES+  
2.91e7

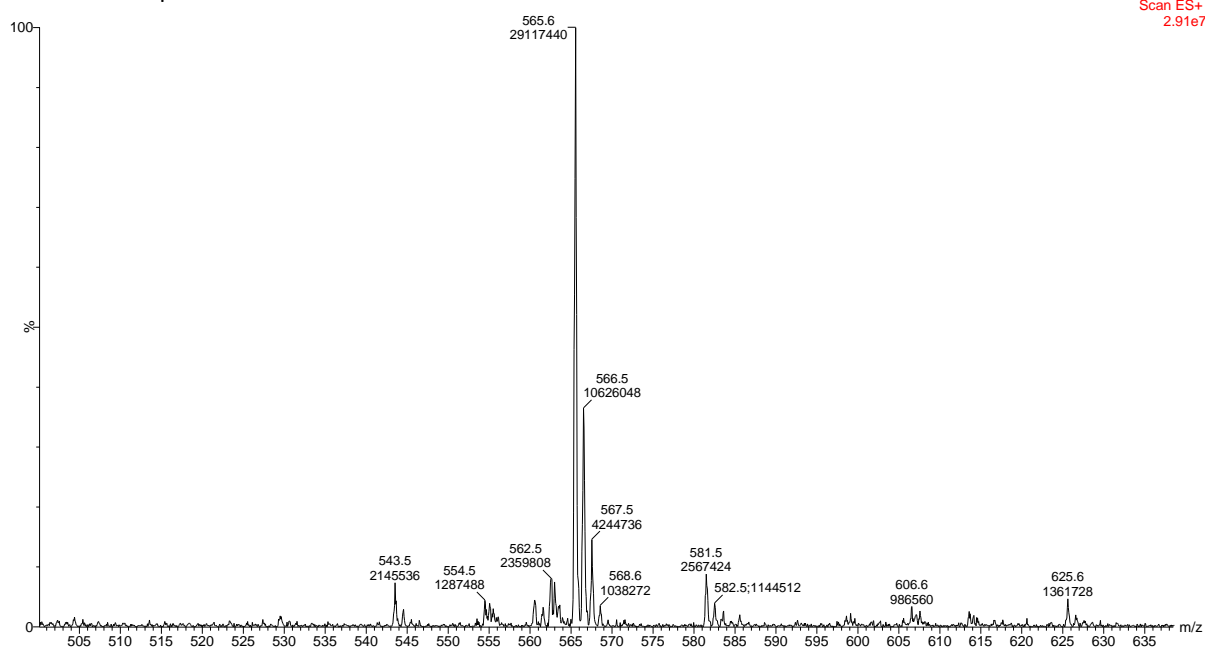

MS ESI<sup>+</sup> compound 9

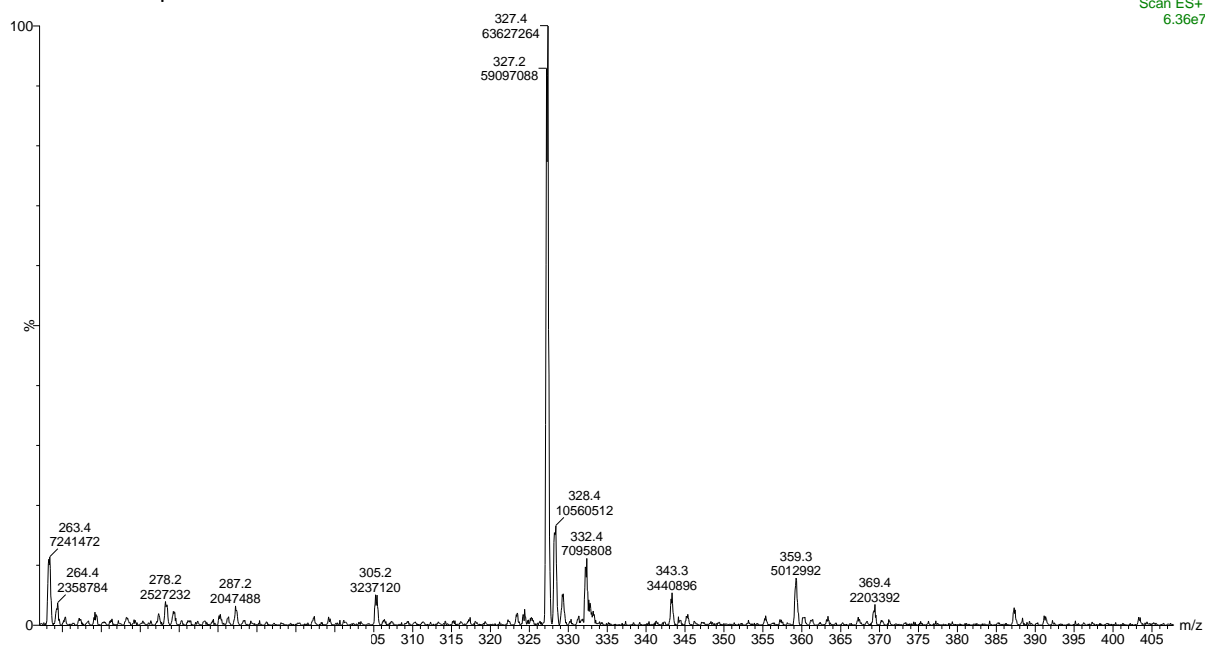

MS ESI<sup>-</sup> compound 10

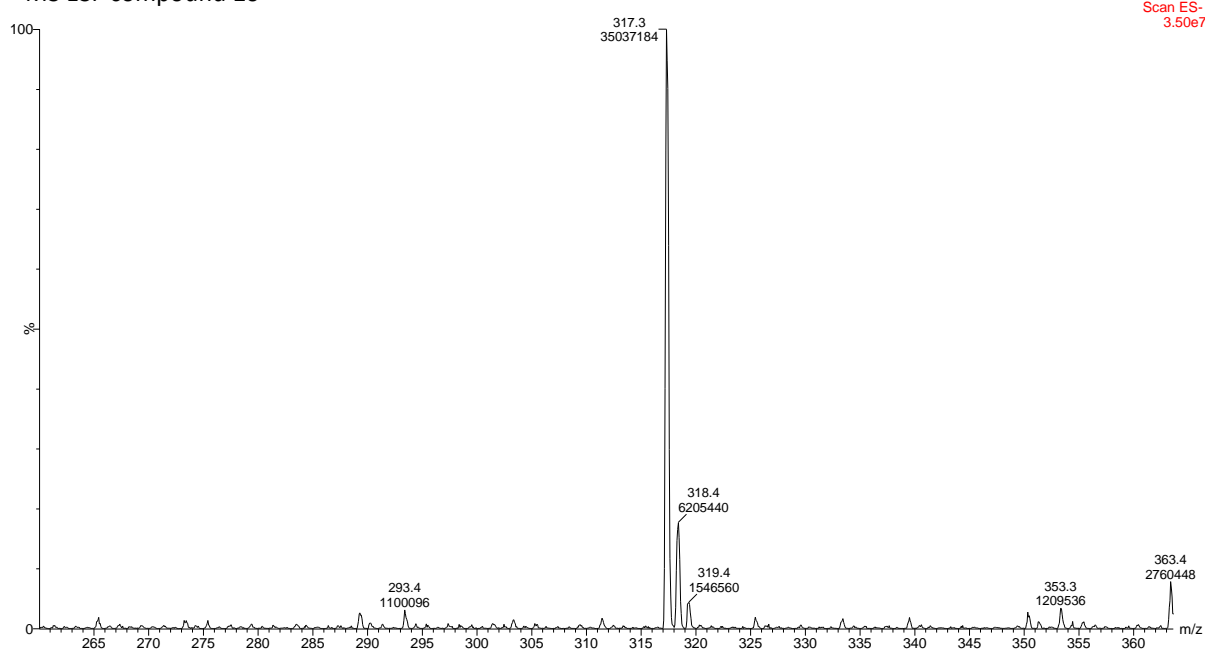

MS ESI<sup>-</sup> compound **12**

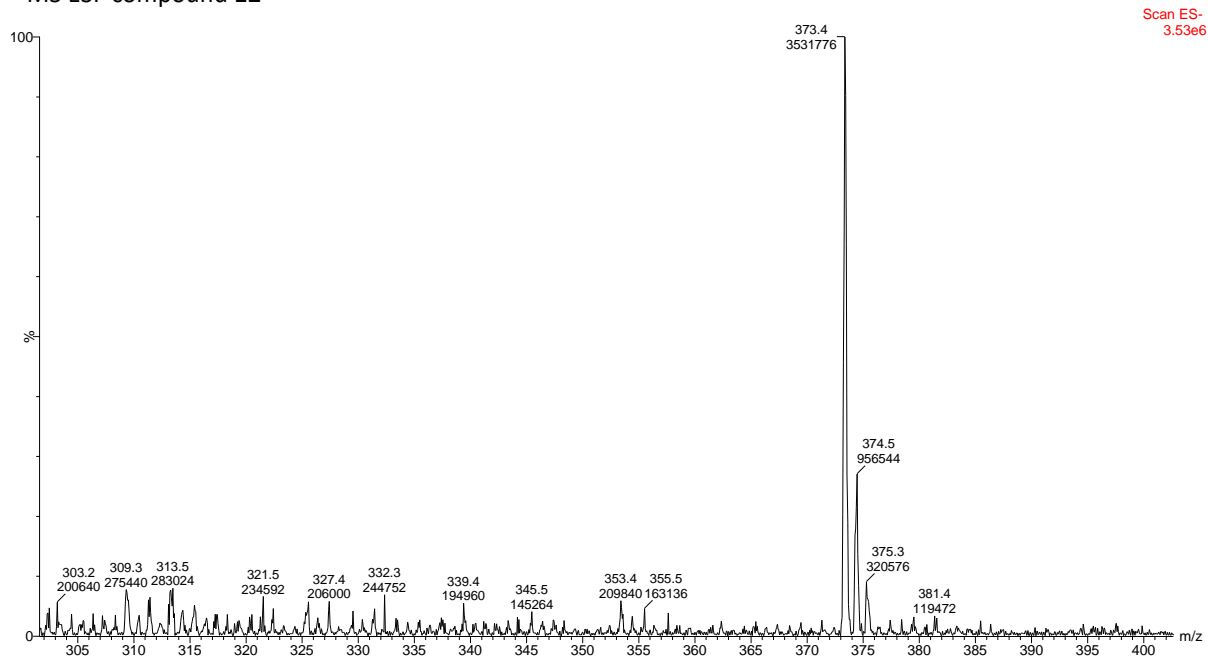

Supplement: s1 [file s1]
